# Supplementary material for: Physical Mapping of the Anopheles (Nyssorhynchus) darlingi Genomic Scaffolds
Source: MDPI journal article supplement (doi:10.3390/insects12020164), 2021-02-15
Supplement: s1 [file s1]

| Gene ID                    | Genomic Location (Gene)          | Product Description                                                                                      | PFam Description                                                                                      | Smart Description                                                                                     | Computed GO Functions                                                                                |
|----------------------------|----------------------------------|----------------------------------------------------------------------------------------------------------|-------------------------------------------------------------------------------------------------------|-------------------------------------------------------------------------------------------------------|------------------------------------------------------------------------------------------------------|
| <a href="#">ADAC000657</a> | ADMH02000163:18,748..20,654(-)   | cytochrome P450 4g15<br>[Source:LNCC;Acc:AD00657]                                                        | Cytochrome P450                                                                                       | N/A                                                                                                   | heme binding;iron ion binding;metal ion binding;monooxygenase activity;oxidoreductase activity       |
| <a href="#">ADAC000745</a> | ADMH02000186:71,906..94,376(-)   | unspecified product                                                                                      | Fibronectin type III                                                                                  | Fibronectin type III;Immunoglobulin subtype                                                           | protein binding                                                                                      |
| <a href="#">ADAC000747</a> | ADMH02000186:67,018..70,655(-)   | Protein tyrosine phosphatase 99A<br>[Source:LNCC;Acc:AD00747]                                            | PTP type protein phosphatase                                                                          | PTP type protein phosphatase;Protein-tyrosine phosphatase, catalytic                                  | hydrolase activity;phosphatase activity;phosphoprotein phosphatase activity;protein tyrosine phos... |
| <a href="#">ADAC000750</a> | ADMH02000186:61,779..62,105(+)   | s-adenosyl-methyl transferase mraw Partial<br>[Source:LNCC;Acc:AD00750]                                  | N/A                                                                                                   | N/A                                                                                                   | transferase activity                                                                                 |
| <a href="#">ADAC001061</a> | ADMH02000279:47,573..52,665(+)   | vitellogenin-A1<br>[Source:LNCC;Acc:AD01061]                                                             | Lipid transport protein, N-terminal;Vitellogenin , open beta-sheet                                    | Lipid transport protein, N-terminal;Vitellogenin , open beta-sheet                                    | lipid transporter activity                                                                           |
| <a href="#">ADAC001064</a> | ADMH02000280:164,647(+)          | vitellogenin-A1<br>[Source:LNCC;Acc:AD01064]                                                             | von Willebrand factor, type D domain;Lipid transport protein, N-terminal;Vitellogenin , open beta-... | von Willebrand factor, type D domain;Lipid transport protein, N-terminal;Vitellogenin , open beta-... | lipid transporter activity                                                                           |
| <a href="#">ADAC001611</a> | ADMH02000416:14,873..17,534(-)   | serine protease Partial<br>[Source:LNCC;Acc:AD01611]                                                     | Serine proteases, trypsin domain                                                                      | Serine proteases, trypsin domain                                                                      | hydrolase activity;peptidase activity;serine-type endopeptidase activity;serine-type peptidase ac... |
| <a href="#">ADAC001991</a> | ADMH02000489:37,286..41,749(+)   | unspecified product                                                                                      | Cyclin, N-terminal                                                                                    | N/A                                                                                                   |                                                                                                      |
| <a href="#">ADAC001999</a> | ADMH02000489:35,004..35,573(+)   | Transmembrane protein 234 homolog<br>[Source:Projected from Anopheles gambiae (AGAP012180) UniProtKB...] | Putative transmembrane family 234                                                                     | N/A                                                                                                   |                                                                                                      |
| <a href="#">ADAC002694</a> | ADMH02000632:47,439..56,535(-)   | unspecified product                                                                                      | N/A                                                                                                   | N/A                                                                                                   |                                                                                                      |
| <a href="#">ADAC002696</a> | ADMH02000632:63,025..71,237(-)   | unspecified product                                                                                      | N/A                                                                                                   | N/A                                                                                                   |                                                                                                      |
| <a href="#">ADAC002703</a> | ADMH02000632:466,687..471,182(+) | molybdopterin cofactor synthesis protein a<br>[Source:LNCC;Acc:AD02703]                                  | Molybdopterin cofactor biosynthesis C (MoaC) domain;Radical SAM                                       | Elp3/MiaB/NifB                                                                                        | 4 iron, 4 sulfur cluster binding;catalytic activity;iron-sulfur cluster binding;metal ion binding    |
| <a href="#">ADAC002704</a> | ADMH02000632:36,573..40,687(-)   | myocyte-specific enhancer factor 2d<br>[Source:LNCC;Acc:AD02704]                                         | Transcription factor, MADS-box;Holliday junction regulator protein family C-terminal                  | Transcription factor, MADS-box                                                                        | DNA binding;RNA polymerase II transcription regulatory region sequence-specific DNA binding;prote... |
| <a href="#">ADAC002712</a> | ADMH02000632:439,415..442,478(-) | notum<br>[Source:LNCC;Acc:AD02712]                                                                       | Pectinacetylsterase /NOTUM                                                                            | N/A                                                                                                   | hydrolase activity                                                                                   |
| <a href="#">ADAC002722</a> | ADMH02000632:336,301..337,999(+) | ATP-dependent RNA helicase DBP8<br>[Source:LNCC;Acc:AD02722]                                             | DEAD/DEAH box helicase domain;Helicase, C-terminal                                                    | Helicase superfamily 1/2, ATP-binding domain;Helicase, C-terminal                                     | ATP binding;helicase activity;hydrolase activity;nucleic acid binding;nucleotide binding             |
| <a href="#">ADAC002731</a> | ADMH02000632:437,284..438,248(+) | odorant-binding protein<br>[Source:Projected from Anopheles gambiae (AGAP006074) VB Community Annota...] | N/A                                                                                                   | N/A                                                                                                   |                                                                                                      |
| <a href="#">ADAC002732</a> | ADMH02000632:471,304..471,918(-) | endothelial precursor protein B9<br>[Source:LNCC;Acc:AD02732]                                            | B9 domain                                                                                             | N/A                                                                                                   |                                                                                                      |
| <a href="#">ADAC002733</a> | ADMH02000632:472,599..473,187(-) | prefoldin<br>[Source:LNCC;Acc:AD02733]                                                                   | Prefoldin beta-like                                                                                   | N/A                                                                                                   | unfolded protein binding                                                                             |
| <a href="#">ADAC002734</a> | ADMH02000632:463,803..464,375(+) | unspecified product                                                                                      | N/A                                                                                                   | N/A                                                                                                   |                                                                                                      |
| <a href="#">ADAC002737</a> | ADMH02000632:338,192..338,584(-) | 40S ribosomal protein S24<br>[Source:LNCC;Acc:AD02737]                                                   | Ribosomal protein S24e                                                                                | N/A                                                                                                   | structural constituent of ribosome                                                                   |
| <a href="#">ADAC002738</a> | ADMH02000632:473,567..473,872(+) | Protein with signal anchor<br>[Source:UniProtKB/TR EMBL;Acc:WSJN37]                                      | N/A                                                                                                   | N/A                                                                                                   |                                                                                                      |
| <a href="#">ADAC003002</a> | ADMH02000727:870,717(+)          | vitellogenin-A1<br>[Source:LNCC;Acc:AD03002]                                                             | von Willebrand factor, type D domain;Lipid transport protein, N-terminal;Vitellogenin , open beta-... | von Willebrand factor, type D domain;Lipid transport protein, N-terminal;Vitellogenin , open beta-... | lipid transporter activity                                                                           |
| <a href="#">ADAC006083</a> | ADMH02001516:9,879..14,948(-)    | Bardet-Biedl syndrome 2 protein<br>[Source:Projected from Anopheles gambiae (AGAP009637) VB Communit...] | Ciliary BBSome complex subunit 2, N-terminal;Ciliary BBSome complex subunit 2, C-terminal domain;...  | N/A                                                                                                   |                                                                                                      |
| <a href="#">ADAC006086</a> | ADMH02001516:15,980..16,999(+)   | CDK-activating kinase assembly factor MAT1<br>[Source:LNCC;Acc:AD06086]                                  | Cdk-activating kinase assembly factor MAT1, centre;Zinc finger, RING-type                             | Zinc finger, RING-type                                                                                | cyclin-dependent protein serine/threonine kinase activator activity;kinase activity;ligase           |
