# Supplementary material for: Physical Mapping of the Anopheles (Nyssorhynchus) darlingi Genomic Scaffolds
Source: MDPI journal article supplement (doi:10.3390/insects12020164), 2021-02-15
Supplement: s1 [file s1]

| Probe           | BLAST Hits                | Gene IDs                                                                           |
|-----------------|---------------------------|------------------------------------------------------------------------------------|
| Pb2r            |                           |                                                                                    |
| >DGSJ02D08C.b00 | NO HIT                    |                                                                                    |
| >DGSJ02D08C.g00 | scaffold_732              | ADAC001061                                                                         |
|                 | scaffold_1942             | ADAC003002                                                                         |
|                 | scaffold_1482             | ADAC001064                                                                         |
| Pb5r            |                           |                                                                                    |
| >DGSJ04D09C.b00 | scaffold_112              |                                                                                    |
| >DGSJ04D09C.g00 | scaffold_112              |                                                                                    |
|                 | scaffold_112:91297-130051 | No annotated gene                                                                  |
| Pb7b            |                           |                                                                                    |
| >DGSJ01A02C.b02 | scaffold_281              |                                                                                    |
| >DGSJ01A02C.g00 | scaffold_281              |                                                                                    |
|                 | scaffold_281:57476-88809  | ADAC000747, ADAC000745, ADAC000750                                                 |
| Probe 17r       |                           |                                                                                    |
| >DGSJ01A09C.g00 | scaffold_1409             | ADAC001611 (within 5Kb from Blast hit)                                             |
| >DGSJ01A09C.b02 | scaffold_1350             | ADAC006083, ADAC006086 (within 5Kb from Blast hit)                                 |
| Pb18b           |                           |                                                                                    |
| >DGSJ02B03C.b00 | scaffold_683              | No annotated gene                                                                  |
| >DGSJ02B03C.g00 | scaffold_1062             | No annotated gene                                                                  |
| Pb19r           |                           |                                                                                    |
| >DGSJ02B06C.b00 | scaffold_17               |                                                                                    |
| >DGSJ02B06C.g00 | scaffold_17               |                                                                                    |
|                 | scaffold_17:336283-371424 | ADAC002722, ADAC002737                                                             |
| Pb20b           |                           |                                                                                    |
| >DGSJ01C04C.b02 | NO HIT                    |                                                                                    |
| >DGSJ01C04C.g00 | scaffold_958              | ADAC000657 (within 5Kb from Blast hit)                                             |
| Pb22b           |                           |                                                                                    |
| >DGSJ01E05C.b02 | scaffold_17               |                                                                                    |
| >DGSJ01E05C.g00 | scaffold_17               |                                                                                    |
|                 | scaffold_17:39978-73280   | ADAC002704, ADAC002694, ADAC002696                                                 |
| Pb23r           |                           |                                                                                    |
| >DGSJ01C06C.b02 | scaffold_17               |                                                                                    |
| >DGSJ01C06C.g00 | scaffold_17               |                                                                                    |
|                 | scaffold_17:435950-474554 | ADAC002731, ADAC002734, ADAC002703, ADAC002712, ADAC002732, ADAC002738, ADAC002733 |
