# Supplementary material for: Physical Mapping of the Anopheles (Nyssorhynchus) darlingi Genomic Scaffolds
Source: MDPI journal article supplement (doi:10.3390/insects12020164), 2021-02-15
Supplement: s1 [file s1]

Pb2r

>DGSJ02D08C.b00 740 0 740 ABI trimmed

GGTTTTCCCAGTCACGACGTTGTTACCGACGGCCAGTGAATTGTAATACGACTCACTATA  
GGGCGAATTCGAGCTCGGTACCCGGGGATCCCACCTGTGAAAGCTTAGGATTATTTATGT  
GACGCTTGATCCAACGACCACCGTCGTCTTCCGTCTGTGGCCGATATCCCGTCCGATCAC  
TCGAAATGCATCATACACGAGAGATGCAAGACATCGACATTTCTGCAAACACCCCCCTC  
GCCTCCACCTACCACGCATTCCACGCAGCAGTGCCCTTGCTTCGTTAGTGAAGCGGATT  
GAAACAGCGCCAGACACACGCCGCATTGCGTTAGTCGTCCCACCCGATGTGGCCACCCAA  
TCGCGCTACGCATGCCACTTAACACGGCTGTCGGATGTCGAGCGTTGCAGCTGCTGTTGC  
TGTTGCCTTCTGCTCCGGGTTAGATATCCGCTACAGGCCCCCGGGGCACTAGAGATTTGA  
TTTTCGCAGCCGAGTAATTCCGTTAGAACGCATTAGCGGGTCTGTGTGCGCTGGTTAGCG  
CAACCAAACGCCCCGACCTCACTTCGAAACTCCTAGCACTAGCCAGCACTGTTGCTGCTGC  
TGCTGCTGCTGCACTCGCGCTCAGTGTATGCGCAGTTGCAACCCATTAACCTATCGATAA  
GATGTATGGTAAGCAAAACCGCACTGCTACTGGCGTTTGCCCCGCCAGTATGCGCGCTCG  
GTGTAAGGTCGAATCGGCTC

>DGSJ02D08C.g00 742 0 742 ABI trimmed

GCTATGACCATGCCCACGCCAAGCTATTTAGGTGAGACTATACAATACTCAAGCTTGCAT  
GCCTGCAGGTCGACTCTAGAGGATCCCACCCACAGCTTCGGTCGCTTGGCTGATGAGGAC  
TACAAGATCGTCGCCCACAAGGTTGTCCCGTGGCTGTCCCACCAGCTGCGTGAGGCCGTG  
AAGGCTGGAGACAGCATCAAGGTTCAAGGTGTACATTCGTTGTCTTGGACACCTTGGACAC  
CCGGAAATCCTGAACGTCTTCGAACCCTACCTGGAAGGCAAGATTCCCGTCACCCACTTC

CAGCGCCTGGCCATCATTGTTGCCTTCGACCGTCTGGTGGAGAACTACCCGCGTCTGGCC  
CGCTCTGTCCTGTTCAAGGTGTACCAGAACACCGGAGATGCCCATGAGGTCCGTTGCGCC  
GCCGTCTACCTGTTGGTCCGCACCAAGCCGCCAGTATACATGCTCCAGCGCATGGCTGAG  
CAGACCCACTACGACCCCAGCACCTACGTGCGCGCCGCTGTCAAGACTGCTCTGGAGAGC  
GCCTCGGAAGCCGATGAGTTCGATGATGATGATGAGTTCTGGCAGAACGCCAGGCCGCC  
ATCAAGCACCTGAACCCCCGCGACTTCAGCCTCCAGTACTCGGGCACCTACCTGCGTGAC  
TTTGCCCTTCAGGAACTCGAGCTGTCCTACCGTCTGTACTTCTCCCAGATTGCCTCTGAC  
GATCACTTCGTCCCGAGCGGAT

Pb5r

>DGSJ04D09C.b00 442 0 442 ABI trimmed

TGTTTTGATGATTTACCGAAGAACCGACACCGGTGCGGTTACTGCGATACCGGATGACG  
TGGCAAATTTCAATCCAATTCCTTCTCGCACCCGGTCCCCGGGGGGTGGCGGGTGTA  
CCGATAGCGTAATGGCAGCAAGGGTAGCAATGGTATCTCATTACTCCAGCCCTTGGCGTA  
CGTACTCCGACAACAAAACGAAACGAAATTAAATGAAATGAATGACGACACCCACGGGC  
AGGGTTTGGTTTGGTTGTGGCGTCATTGAATGGTCTTGCCCCCGGGGGGGGGGGGGA  
AGAGCATCCCCCTAGGTAGCGACATTCAAATAAAGCCTCCCTGCCGGGGGTTTCAAGGGA  
AGCTAATGCATAATGTTTACGCATGCTGGTGCACAGAAGAACGACCAGCACAGCAATACAC  
GCGCTTTCTGCGACTGCGTGAC

>DGSJ04D09C.g00 768 0 768 ABI trimmed

TGTTGCGCTCGTCCTTATCCCATAGCAACGCAACGCATCACCGAGCGGTGTGTACAGTCC  
GGGAAGGAGGAAATCACAGCATTGCCTCAATCTAACCTCCGAGTGCTAGATTGCCGGGA

CCGTAGTACGGAAGTATTGCTAATGGATCCGCTGAGGTGGAAAATATTGCGGTTTACAGT  
AGTTTGCCTCACCACAAACGGCTCGTACGGTGGTGGTCTGACTGAGTAATCGGTCAGCAT  
CCGGCCATCGGTCGAGAGAGGGAGAGTGCGATAGAGGGATCAGTGACCAGTGATAGTGC  
ATCAAACATCGAACTGAAGCAGCACAACTGCGGTTGGCTCAGGCTGGTTAAAGTCAGCGT  
CAACCTCAAGCCGGACAATCTGTATCGGAATGATAAACGGTCAGCTATCGGGGTGTGTTT  
GTCATTCACTCCGTGGTCATCGTAAGGATCTATTCAAACGCAAACTGGACTTGAAACAGT  
CAACGCAAGCGATAACTGCTATTGTACATCTAGTGGATTCTTTAAGGATTAAAATTTAA  
AAAGGAAGCCTGGGCCATTGTTGTCAAACCTTTCATCTTAATTAACATCATATAATCC  
GATTCGATGAAGAGCGATACTCGATATCGAAGCACTTGGTAGCATTTCTTTGTAAACCTG  
AGAGTGAAAATCTGCACCAAACCTTCCACAAATTGAACTTTATGGGAATCATTTGGGAAT  
ATTATATCTTCAGCATCGCTCAAAGATGCTATAAGACTGCTAATGAAA

Pb7b

>DGSJ01A02C.b02 827 0 827 ABI trimmed

GTTTTCCCAGTCCGACGTTGTAAACGACGGCCAGTGAATTGTAATACGACTCACTATAGG  
GCGAATTCGAGCTCGGTACCCGGGGATCCACCTGGTACAAGGTGAGTGTACTAACCCCC  
GGGTCCTGGACCGGGACCCGAACCTGGATGAGTTGTGTTTGGTCGCCATCCACCGACCGA  
CCGACAGAACGAAGGAAGGTCGGACACCGGAATCACCACCGGACGCTCGGTGCGAGGCAG  
ATAAATATCCCGGTCCCTCTTGTCTCCCTTCCTCGGGGCGAAGTGGTCCACGGAAGTTG  
AAGGAGATTGAGCATTCTCTGGCCACACTCTGACAAGAAAATGTATCACTCTCGACGAC  
GCAGACGACGACCAGGACGAAACCAAAGACCACGACCATCCTCTTTACCTTTTGCGCCT  
CACCGAAACACCTCGATTACCTCCGCTCTTTATCCGCTTCTGCCACGTTTGTTCCACAG

ATGTTCCCGAACCACCCGGACGTCCGCTGGTCGTAAGCTTCACGTCACGTTCCGGTCGATT  
TATCCTGGGCTCACTCGCAGGACCCCCGAAATGCACCGGTTACAAATTTTCATCATCGAAA  
CACGGTAAGCCACACCGACCCGGCCCGGCCGATCCGACCCAACCGGAGCTGTCCGGAGC  
AGCCATTTTCGTCGGCATTATGTTTAGATTACACCCTCCAGGTTCAGAATCCATCCAGTT  
CGGACCACGGCGGTTGCAGTGGCTGAGGCTGCGACGTATCTGCGCCAACACACACACAGC  
CTCTCTCTCTCCCTCTAGAACTCGAATCCCGCTAGAACCGAACCGGG

>DGSJ01A02C.g00 803 0 803 ABI trimmed

ACGCCAAGCTATTTAGGTGAGACTATACAATACTCAAGCTTGCATGCCTGCAGGTCGACT  
CTAGAGGATCCCACCGAGCGATGTGACGGATATTGCTAATGGGTATGGAGCGATGACGAG  
AGGGCTAGGAGGAGGATGTTGGTCGCATCAGGGATTACGGACGGGGATGGAAGGTGAAAA  
CTACTAGATTTATTCCAGGGTGTTGTAATCGTATTTTTAATGCTCTCAAGCCTGTCAAGT  
GCGCCATGTTAGTGCTATTTGTTTGTGAGTGCCGCCAGGGTTAAGGTTTTATTATAAA  
AATACGATTTGTAACGATTTAGAAGGGACTTTTCGATTCATACGGGATTCTTTGCTTTTC  
AATGATGAATTTTCCTCAAGGAAAGTGCTACTTTATCCATGGGATATTCGTTCTTGGGGT  
TTACTTGTCCATTTACATTCGTTAACAACATTTAAGAAGTGCAGAATTAATAATCATAG  
TAACATCAAAAATTATGCGTGCCAATGTGATTTAGTAATTTTCCAATGTATGATCTTCGT  
GAAAATGATTTATTAAAAATATTTGTGAAATAATATTCACAAATCTGTAAATACAACTA  
TTTGAGAATCTTTGGGTATTTAGGAAGATCATACTAGACCGCCACTACCTCAACATGTCG  
CTTGAACTCCTTTGGCTTTTAACATCCTTTGGCTTACTTTTATAATTTATATCAAATTTA  
TCTTCAATATCGTTTCGTCTCCTTCCTTAGGCCTTGCAGGAGTTAAAAACATCTTTCG  
AAATCGACCTAAGATCGAGCGAT

Pb17r

>DGSJ01A09C.b02 747 0 747 ABI trimmed

GGGTTTTCCCGTCACGACGTTGTAATACCACGGCCAGTGAATTGTAATACGACTCACTCA  
TAGGGCGAATTCGAGCTCGGTACCCGGGGATCCCACGTGCATCCGAAGATCAGCAGTTCA  
ACCTGTTGATAGTACGTACTAAGCTCTCATGTTTCACGTACTAAGCTCTCATGTTTAACG  
TACTAAGCTCTCATGTTTAACGAACTAAACCCTCATGGCTAACGTACTAAGCTCTCATGG  
CTAACGTACTAAGCTCTCATGTTTCACGTACTAAGCTCTCATGTTTGAACAATAAAATTA  
ATATAAATCAGCAACTTAAATAGCCTCTAAGGTTTTAAGTTTTATAAGAAAAAAAAGAAT  
ATATAAGGCTTTTAAAGCTTTTAAAGGTTTCACCGGTGACGATGACGAGATCGAGCATACC  
GATGCCACGGTAGTCGTTGCAGGCCATCCCGCAAACGAACTCGTTCATTTTCATCTTGAA  
CCACACGTCCCCGGTGCGAGGATCCCGCACATCCATCTTGCCGCTCTTCCACCCGATGAT  
CATCTGCTTACTATCGCATCCGAGGATATCGTACGTGGCCATAGCGGTGGCACGGGTTTT  
CGATTTAATGCGCCATAGGCGCACACTTTCTCGAACACACCGATCGTACCATTCTTTAC  
GCTGTACATAAACTGACCTGGACGTAGGGTGGCTAAATTTTGGATCTCATTTCCCTCGGC  
AAACTCGTGCAGCAGGGTTTCCCTCTT

>DGSJ01A09C.g00 682 0 682 ABI trimmed

GCCAAGCTATTTAGGTGAGACTATAGCATACTCAAGCTTGCATGCCTGCAGGTCGACTCT  
AGAGGATCCCACATTACGAAGATCGGAAGCGAGCATTACGGTGCCCCGGTCAACGAGGCC  
GACAAGGTGAACATGCTGGTCAACAAGATCGTCCAATCGTTCAACGGTAACTTTGATGAG  
CTGGAGCAGATACTGAAGGAACGCAAGAACCTGACGCTGGCCAGCAACGGAGCCGCCGAT  
ACGCCGATCGCGGTAGGCGCTGGCGTTTCGCCATCCAGCAGCAGCAGCAGTAGTACAACC

GAGAGCAATGCGTTAACTAGCAGCACCCTGCTAAGCCCAAGAAGAAGAAGCGCCCC  
AGCCGTAAGCCGGTCAATGGAACGACTAGTGGCACGAAGAAACCAACGAGCGCCACCGCT  
AAACCGACCGTACTGGCCGATACACCGGTCAGTGGAACGTCACAAAGCCAACGGCACGT  
CCATCCAAGAAGCCCAACAAAGTGCGTCGTCCAAGCAACTCCACGGCGAAACCATCGTCG  
AAACCCACGACCAAACCGACCAAGTGTCAAGTTCGGTCAACAAACCGGCACCGGGCGCTGCC  
AACGATAGTCCGGCTAAACCGGTGAAACCATCGACCAAACCGAAACCGACGGCTTCCTCG  
TCGTCATCGGTGGGCGCTTCCT

Pb18b

>DGSJ02B03C.b00 815 0 815 ABI trimmed

GGTTTTCCAGTCACGACGTTGTTACCGACGGCCAGTGAATTGTAATACGACTCACTATAG  
GGCGAATTCGAGCTCGGTACCCGGGGATCCACGCAGCCACCCAGACTGAGGGGGATGC  
GTGGATGAAGTTTTCCGTTTTTCTCCAGGGAAGATCGAATTGCTTCTTCACACAAAAGGA  
TTAATAAAAACATAATAATCGGTGTTTTTGGAGGTTATTGTGCAGCTTAATGTGACACC  
GATTGGTACAATACATCTCACTTGTTTTTACGATGGGAAAACATGACTTTTTGGTACCAC  
AAAGTGGGTTTGTTGGTTGATCCAGCAAGATGATGATGCGCAAGCCATGTTCAAAGTAT  
TATAACATGTTTTTTCATGTTTTCTTTATTGAAATACTATCCTTTGTACCAACACGAC  
GATTCATCTTACAGGGATGCAGACAATTAGCTGTCAAATTTATTATAGTCCTTTATGAC  
CGTATGGCTCAAATGTAAACCTAGTCAAAGCGAAATTAAATGGTTTAATGCGCTCAATTT  
GATGCGCTGTTTATGTAACAACGAAACAAGTTGTTTTCTGTCACGTATACTCTCTAGGCA  
CTTGAACATAGAAAAACACATTCTGTCCAGTAATGTAAGGCTTCTAATAAGCAATTCGTG  
GAATTTGTCTATTAACTTAAATTGTTTTGTTGAAAAGAAATTGCACGACAAAAAGCGAC  
GAGTATGTTTCGTAGAACTACAAAAGAAACACGATTGCAGATAAAAAAAGTAACGAAAA

ACATTTTCCTTTATGCTAATGATAAATACGACTAGC

>DGSJ02B03C.g00 772 0 772 ABI trimmed

GCTATGACCATGACTACGCCAAGCTATTTAGGTGAGACTATACAATACTCAAGCTTGCAT  
GCCTGCAGGTCGACTCTAGAGGATCCCACCAAACATCCGCCACCAGTTCGGGATTGTGT  
TCGCTCAGATCCAATCGATTCTTGGTCATTTCTGCTCAAATCAGTGTTCTGATAGTTGAT  
CAAATTGATTGCTACCGGAACTGTCCATTTTTATAAAGATCTATCAGAGATCATTGAATA  
ATTTGTACATTTTCAATCATTCAATTCGATAGTTGAGGTGCTATATGGATACTTGCTTGC  
ATGAATGCATACTGACGCAGATCGCTGGCAGGTCAGTTGCTATCCATATGTGAATCCTAA  
TTCCAAGTTGTGTGGAACGTGTGTTTTTGTGATAGAAATAAGGATGCTGTTATTTACAA  
GAAGCAAAAAAACCTAAAGTATCACGTCATCCTGAACCAACGTCATGTATTGGAGCATGG  
CCAATGGGTGCCATCTATTAACGTCTTAACGATCACCGTTTGCAATCGCATCCCGAGTGG  
TCTAGTAGTCGTTGGTCGGAAACCGGGACATCGGATGGGGACTTCGTGGTCGTGGTATTG  
CTGTTTGCCAACGCGTAACTATCGCTTTCTTCTAGCTGGGGCCACAAGGGCTAGTGTACT  
TGCACAGGCGCATCGCCATCGTTTGCCCGCCGGCCAACGCCACGGTTCTAATCGGATGAT  
ATAATTGTTGCTTTCTCGCTTGTTTGTTCAACGGACTGCTTCGTCGGATCGC

Pb19r

>DGSJ02B06C.b00 829 0 829 ABI trimmed

GGTTTTCCAGTCCGACGTTGTATCCGACGGCCAGTGAATTGTAATACGACTCACTATAGG  
GCGAATTCGAGCTCGGTACCCGGGGATCCCACTGTTTTCGGTGGCAATCACTCGGAAGTG  
AAGGCGCGTAATTGCATTTCTTCCTCGCAAGAGAGAGAGAGAGCCTCACGACGACGGTT  
AATTACGGCCAAGACGTAAACATCCGCTCGTGCGATATGCTGCTGCCGCTGCTGCCTCTG  
CAGCCTTTGAAAGGGAAAGCCGTCGAGATGCCGGCACCCAGCTGGAGTTTTGAAGAGATT

CGTGCAGAAGTCTCGTGTCTGGTGTCTGGTGGGATGCAAAGCACGAAAGAATTCGGAATC  
ATTCATCACTCCAACCAGGCGCGCAGGGGATCCACAGACCAGCGCATGAATCATTGAGCA  
CCGTGCAACAGCGTGCGGCTAAAAGATGGATTGATGTGTTTGGCCCCCAGGGTGAAAGAG  
GTAGCTGCTGTGCACTGCGTGGCCATGCCAAAGGCGGCCAAAGATCAGAGTCATGTTTT  
CAACGCTGCGTCATCACAACGCAGTAGCATGGTGGCATCGTGCTGCTGCGTTCTTGAAAG  
TATTTTTGCTCAAGTTGCGGCGTGTGAAGAGAAAATTAACGGAACAACGTATCGCTC  
CGCTCGCCAGCCATCAGTCGTTGCGCCGTTAATTGGAGGGCACGTGAAACCAATGGCACA  
CAACAGACCCTTTGCTCAGTTCTCGGTACCAGAGGTGCTGTTTTAAATAGCCTCTTCGTC  
GCGGTCCATCATCATCAGCAACACACAAGCTGCTTCACACTCTTCTCCC

>DGSJ02B06C.g00 781 0 781 ABI trimmed

GCCAAGCTATTTAGGTGAGACTATACCATACTCAAGCTTGCATGCCTGCAGGTCGACTCT  
AGAGGATCCCACAGTTCCGTGGTTTTTGTGATGAGTTTGAGAACGGATAAGAGGTTTGCA  
GACCTCGGCCTCACGGCGTGGATCACACGGCAGACGGAGAAATTAGGTAAGTAAACGGGT  
TGATCGCTTTTCCAACACCGGCATGAACGATTCTCTCCTTCTAACTTGCAGGACTCCGTC  
GACCGACTCCGATTCAGGTGGAGTGTATTCCACGAATATTGCAGGGCCAGGATTGCATCG  
GGGCAGCCAAGACCGGATCAGGCAAAACGTTGCGCTTTGCGTTACCGATTCTGCAGAAGC  
TGAGCGAAGAACCGACCGCCAACCTTTGCGCTGGTGCTTACGCCGACTCACGAGTTGGCCC  
ATCAGATCGCGGAACAGTTTATCGTAGCGGGACAACCGATGAATGCGCGCGTTTGTGTTG  
TCACAGGAGGAACGGACCAGTTGCTCGAAGCACAGAAATTACAGAGCAGACCACACATTA  
TCGTGGCCATGCCGGGTCGATTGGCGGACCATTTGAATGGCTGCAACACGTATTCTTTTG  
CCGCCCTCCAGTTTCTCGTCGTGGACGAAGCAGATCGAGTGCTCAGTGGAAGCTTCGATG  
ATGATCTAAGAGTAATCGATCGGTTCTTGCCAGCGAAACGACAGAATCTTTTCTTCTCGG



CCACGATGAAGGATTTCTCAAACTTCGATCGTGTCCCGATCGCTCAGGACGTGTTCG

A

Pb20b

>DGSJ01C04C.b02 823 0 823 ABI trimmed

GTTTTCCAGTCCGACGTTGTATCCGACGGCCAGTGAATTGTAATACGACTCACTATAGGG  
CGAATTCGAGCTCGGTACCCGGGGATCCCACATCAATAGACTCGCTCCTCGATCAACACG  
ACAGCCCCCGGAGGGCCGGAATTTTAATTCAATTCCTTCGTCGAAAATTCGACTGCAAG  
CTACAGAAAGGGGTTAGATTGCTCCCTTTCTTTCCACCCCTCAGCCCATCCCCGGTCGG  
TCGTGATCAGCTCGATCCATCATCACCTCCCGAAAGGCCGCGATAAAGGACCGATTTTCAT  
TGTTTTAAAGCCCCGGGCGTGGTGGGAAGATGAACCGTTTAGCCGTCAATTAAGGCAGG  
GGGTGCCGAACGCTCCCAAAAAAAGGATCGTTTCGTGGCCGCTTTATGCCGTTACGCGG  
CAAGAGCGAAAACACCGAATGACACAGAACAGTCAGCGGAGCAATTAAAGGCTCAAACT  
CGAGGTCGGCGAAGCCAGCCAGAACAATGTAGCAAAAGGACTCCTTCGGGGCGGGATCGG  
TACGGGGGGATAATGAAGCGATAAAAATATTTGACTCATGTTCTCTAATTTTCCAATAT  
CTATACTATGGGCCACACACACACACACATGCGCGTGCACGGGATGCCTAGGGCGA  
CAAGCGAGCTAGCCGTCGGCTGCAGTGAGGTCCTGCCAAAGAGAATGTGAAGCTCGAGAG  
AGAGAGAGGGATTTAATTAGAGCAACCCTTGATAGGCCATTAGGCCAGGAATTTGATTTT  
GGGCCGTTTTTTCATCGTCATCGATCGTTGCCCGCCCCCGGAC

>DGSJ01C04C.g00 692 0 692 ABI trimmed

TACGCCAAGCTATTTAAGTGAGACTATACAATACTCAAGCTTGCATGCCTGCAGGTCGAC  
TCTAGAGGATCCCACATTAGACAAGGCAGGGTCTGCAATCCCTTCTCAGGAGTACAGCCG  
AGGAGTAGCAGGAGAGCCCGAAAGATGTAGCAGTTTCCAATTTAAGTGATGCGAAAAGA

TAATGAACCCCTTTTGGCCGGATCGGTTTCCCGAAGTAGGTTTTCTTATCTCGTATTCCC  
CCCTCAGGAACCTACGGATACCACTCTAGGAGGACGGCATGAGATCGGGTTCAGGGAGAAG  
CCGGGCGCACAAATACAGGTAGCGCTCAGCGCCGCTACAGACATGACAGAGCATAAGCGAA  
AAGAGAGAAAGAGAGAGAGAGCGAAAGGGAGGACAAGCTCACAAGGGGTTGTTATCAGTA  
TGTTGCTTTATTCTCGACTATTTTTTTCCCTCGCAATAGGATCAAATCACACAAACACA  
GCACACATACGCACAGGCGCGCCGAGCAGAGTGGCGGCGGAGTAATGGAGTGATAGTTGG  
TTGGCTAGTTGGTTAATGGTTGGCTGGCCCCGGAGGAGTTGTGATTGACTGGTCGCGCGC  
GCCCGTATCTGACAGTTCAATTAAGCGCCCGAAATCTACAGATCCGGCCACCGCTAGGAT  
CCCGGCTAGGGTAGGGTAGGGTAGGGTAGTGT

Pb22b

>DGSJ01E05C.b02 582 0 582 ABI trimmed

GGGCGAATTCGAGCTCGGTACCCGGGGATCAGCACCAACGCAACACCCCTCTCTTTTCTC  
GCAAGCATGTGTTACAAGATTTATGACTCAGCCTGCACTTGGAGACATCGAGGCTACTCA  
AGAAACCATCTTGCAGGCTGCCATTTTCTCTATTCTCTCGCCATTAGGCAATCAAGCATA  
AAGCAAATGTTAGTGGAAACACAGCAAGGTAAGGGTTAACTCGAATTTGGTTAATAAAAA  
GCACTATAACTGGGCGCGATGCTGTATTGCATTCTGTCACACCCTCTCTTTTCACACAC  
ACACACGCACACACACACACACACACGCACACACACGGCCGGTGCAGTAATACGGTTA  
TCAAATGAAAACAGTTTGTAGCATCACACCGTTAGAGGTACCTCAATTATGTTTTTGTTG  
GTCAGCGACTCGTGCGGCTCGTTGTA CTGGTGTACTTCAGCAGCACCTTGTCATGTCT  
GTGCTGGCATACTGATAGAGCTTATTACTGCTGCTAAAGATAATGAGTGCAATTTACAA  
TCACAAAGTACGGACAGTTCGTACGCCTTCTTCATAACTCCA

>DGSJ01E05C.g00 616 0 616 ABI trimmed

CAAGCTATTTAGGTGAGACTATAGCATACTCAAGCTTGCATGCCTGCAGGTCTGACTCTAG  
AGGATCCCACTTTGATTCTGACTCCGTGCATGACGACCTGCATGAACGTGGATGCCACCC  
TTTACGCGCTGGAGGTTTTGAAGAATTACAAAAGATCGCAGAAAATTGGCCGTTTCAAGA  
ACCACGAAGCTGTACGTAAACATCTTTTAAAAATTATGTGCTGGGATTATTCACAAGAAT  
AGTGGATTTAATTTGTAGGACGTGAGTTTCGAGAAGAGGAGCGGCAGTTATAAACAAACC  
CTTTTTGCGGCCGCGGGGAGGGACCACGTTATTTTTGTTGCACGAATTATTGTTGCGGTC  
GTCCAGAAATGAGCAAAAATCCCTACCGTGTAGCCGTGTCCGGGTGAGTTTCGGTCCGTT  
TTGCGGTAAGCAAAGGGTTGATCGTGCAAGGAGCGAGGAGTGCGAGGCGGGATTGCCGCG  
GAATCACGATCCGTGGATGATCAACATCTTGCGAGCGAGATAAAGTGAGCCAGTGCTATG  
AAAGATAGAAAGAGCGAGCAATAGTTGTGCAAGGTGGATCGAGCGGAGCGGAGGAATACG  
CGAAAGCTTCTCAGAA

Pb23r

>DGSJ01C06C.b02 775 0 775 ABI trimmed

GTTTTCCAGTCCGACGTTGTTTCCGACGGCCAGTGAATTGTAATACGACTCACTATAGGG  
CGAATTCGAGCTCGGTACCCGGGGATCCCACTTCTTATTCGGCCTGACGAAATCGAATAT  
TTAACGCCACAATTAATTTCAACAATTAAATGCCCAATTCTCTGTCCTCTCGACCATAC  
GATCCAGAAATCCCCGCCCCGCTATCAATCAATCTAGACGACTAATACGACAAGCATATT  
CGGTTGTTGTCTTATCGATTGAGCTTTAAAATCCGGCTTTTGAACGAAACGAACGTGTCC  
GATAAGGCAATCCGATATAGCGGCCCTCGGACGTTGAAGCACTACAGACAACGCGTGTTA  
TCTTTCGCTATCAGCATTCCCACCACCCATCTTATGGTTCAGACATTCGATTGCCAGTCT  
GATTCATGGATATGGTACGCGTCGAGGAATGAAATGCCTTCCCGTATCATAAATCAAATC

ACAACGAGCTACGGTTTCTGGGTCACATTTCTCTCTATTTGCTAGTCTTCTTCCGCCAGA  
GACTTTCGTAAAAACACTAGGTGCAAAAACACAAATAAGAATTCCACTTACAACGAATCA  
AAGTCAATACAAAATGTTCCAGATTCTTCGTTCTCGGGGTAGTGTGTTTGGTAGGCTAAT  
GGTAAAGTGGATGAGATTAACTTGTTGCGGGCCACCGCTCTGCACAAACGGCAAAATCC  
TTGGGTAAATACTTCTCCAGGTGCTCTAGCTTCTCGCAACATCATTTTCAGTTCGG

>DGSJ01C06C.g00 790 0 790 ABI trimmed

CGCCAAGCTATTTAGGTGAGACTATACAATACTCAAGCTTGCATGCCTGCAGGTGCGACTC  
TAGAGGATCCCACGTATGATATTTTATTTAATTCATCTCAGCGTTTCGTTGGTCTGCTTT  
ATCTAACACATTTCGATTCCAGCGCGGTACTTGTTGCACAGGATGCTGGATGTCCAGCGA  
ATGGTAGGACAGTTGTGAATACCCCCAGGAACATGCAATTATCTATTATCCTTCCCAAA  
GCAACGCAGGAGCCAGCACGATTTTAAATATGCTCAATGTTTTGCTTCACATAAACAATA  
CAAAGTTCAGCCGCCCGCTTTACAGCAGCTCGATAATCCGCTCCGGAAACTGGTCGGCC  
AGGGCATGTAGTTTAACTTCGTTCAACTCCAAACCCTGGATGATTCCCATCTCTTCATAA  
ACACACTGTGATAGACACTGCAACGAATACATTCATCTTCTGAGGTTATTAATCATT  
CACCAGTCGAGACTCCAAACCGTACCATTCCGTAATCGATCCAGGATTCTCCTTTG  
CAGCCGCTTCTCCTGACAAACAGGCTCCAATGAGCGTGGAATAGGGTCTCCAGTCGAC  
AGCAGTCCATCAATTCGTGCACCTACAATACATAACAATATTTCAACATAGCGATAACA  
CTTCCTTCTTCGAAGAATAGCTGATAATACCTACATCATTACGTGATATGCAGTTGCTAT  
CCGCCAGTAGCTAATACCCGTTGCAGGAGGAAAACAGAAAAATATTTTATTAAGAATATA  
TTGACGCTAT
